# Supplementary material
Source: PubMed Central journal article supplement (PMC5304297)
Supplement: ml6b00461_si_001.pdf [file ml6b00461_si_001.pdf]

Supporting Information for:

## Discovery of VU0467485: An M<sub>4</sub> PAM Evaluated as a Preclinical Candidate for the Treatment of Schizophrenia

Michael R. Wood,<sup>†,||,§</sup> Meredith J. Noetzel,<sup>†,||,§</sup> Bruce J. Melancon,<sup>†,||</sup> Michael S. Poslusney,<sup>||</sup> Kellie D. Nance,<sup>||</sup> Miguel A. Hurtado,<sup>||</sup> Vincent B. Luscombe,<sup>†,||</sup> Rebecca L. Weiner,<sup>†,||</sup> Alice L. Rodriguez,<sup>†,||</sup> Atin Lamsal,<sup>†,||</sup> Sichen Chang,<sup>†,||</sup> Michael Bubser,<sup>†,||</sup> Anna L. Blobaum,<sup>†,||</sup> Darren W. Engers,<sup>†,||</sup> Colleen M. Niswender,<sup>†,||,γ</sup> Carrie K. Jones,<sup>†,||,γ</sup> Nicholas J. Brandon,<sup>ψ</sup> Michael W. Wood,<sup>ψ</sup> Mark E. Duggan,<sup>ψ</sup> P. Jeffrey Conn,<sup>†,||,γ</sup> Thomas M. Bridges,<sup>†,||\*</sup> and Craig W. Lindsley<sup>†,||\*</sup>

<sup>†</sup>Department of Pharmacology, Vanderbilt University School of Medicine, Nashville, TN 37232, United States

<sup>||</sup>Vanderbilt Center for Neuroscience Drug Discovery, Vanderbilt University School of Medicine, Nashville, TN 37232, United States

<sup>ψ</sup>Neuroscience Innovative Medicines, Astra Zeneca, 141 Portland Street, Cambridge, MA 02139, USA

<sup>γ</sup>Vanderbilt Kennedy Center, Vanderbilt University School of Medicine, Nashville, TN 37232, USA

<sup>§</sup>These three authors contributed equally

### **Table of Contents:**

|                                              |        |
|----------------------------------------------|--------|
| General Experimental.....                    | S2     |
| Chemistry Experimental.....                  | S2-S3  |
| In Vitro Pharmacology Methods.....           | S4     |
| In Vivo Pharmacology Methods.....            | S4     |
| In Vitro DMPK Methods.....                   | S5     |
| In Vivo DMPK Methods.....                    | S6     |
| Ancillary Pharmacology and Mutagenicity..... | S7-S11 |

### **Experimental Section**

All reactions were carried out employing standard chemical techniques under inert atmosphere. Solvents used for extraction, washing, and chromatography were HPLC grade. Unless otherwise noted, all reagents were purchased from Aldrich Chemical Co. and were used without further purification. Analytical thin layer chromatography was performed on 250  $\mu\text{m}$  silica gel plates from Sorbent Technologies. Analytical HPLC was performed on an Agilent 1200 LCMS with UV detection at 215 nm and 254 nm along with ELSD detection and electrospray ionization, with all final compounds showing > 95% purity and a parent mass ion consistent with the desired structure. All NMR spectra were recorded on a 400 MHz Bruker AV-400 instrument.  $^1\text{H}$  chemical shifts are reported as  $\delta$  values in ppm relative to the residual solvent peak (MeOD = 3.31,  $\text{CDCl}_3$  = 7.26). Data are reported as follows: chemical shift, multiplicity (br = broad, s = singlet, d = doublet, t = triplet, q = quartet, quint = quintet, m = multiplet), coupling constant (Hz), and integration.  $^{13}\text{C}$  chemical shifts are reported as  $\delta$  values in ppm relative to the residual solvent peak (MeOD = 49.0,  $\text{CDCl}_3$  = 77.16). Low resolution mass spectra were obtained on an Agilent 1200 LCMS with electrospray ionization. High resolution mass spectra were recorded on a Waters QToF-API-US plus Acquity system with electrospray ionization. Automated flash column chromatography was performed on a Teledyne ISCO Combiflash Rf system. Preparative purification of library compounds was performed on a Gilson 215 preparative LC system.

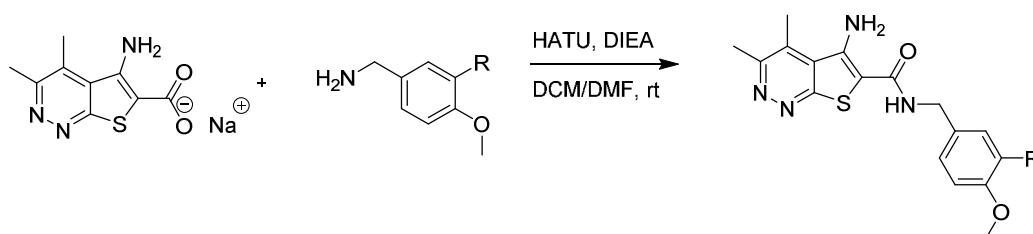

**General Procedure for Library Synthesis.** Compounds **6** were synthesized in parallel according to the following procedure. Sodium carboxylate **5** (0.34 mmol) was dissolved in DMF and *N,N*-diisopropylethylamine (0.5 mmol) added. Then, the appropriate benzyl amine was added at rt and allowed to stir for 2 hours. Next, the reactions were partitioned into  $\text{CHCl}_2$  and  $\text{H}_2\text{O}$  and then passed through disposable phase-separator columns (Biotage Isolute). The organics were concentrated on a heated air-drying block and then analyzed by LCMS. Purification by mass-directed Preparative HPLC afforded desired products **6** as solids and lightly colored (55-97%) with >98% purity by ELSD and 214 nm/254 nm UV analysis.

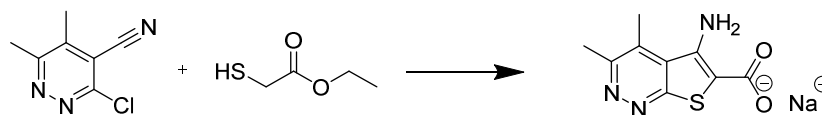

**5-amino-3,4-dimethylthieno[2,3-c]pyridazine-6-carboxylate (5):** This compound was synthesized as previously described: *ACS Chem. Neurosci.* **2014**, *5*, 920-941. LCMS:  $R_t=0.320$  min,  $M+H=224.0$ ; >98% @ 215 and 254 nm;  $^1\text{H}$  NMR (400 MHz,  $\text{DMSO}-d_6$ ):  $\delta$  6.92 (br s, 2H), 2.73 (s, 3H), 2.71 (s, 3H);  $^{13}\text{C}$  NMR (100 MHz,  $\text{DMSO}-d_6$ ):  $\delta$  166.8, 160.9, 154.9, 148.0, 133.5, 127.0, 20.2, 15.1.

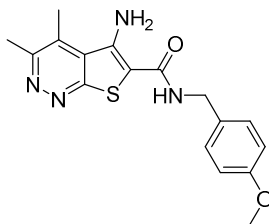

**5-amino-*N*-(4-methoxybenzyl)-3,4-dimethylthieno[2,3-*c*]pyridazine-6-carboxamide (6a, VU0464090):** A solution of 5-amino-3,4-dimethylthieno[2,3-*c*]pyridazine-6-carboxylate **5** (1.0 eq), HATU (1.0 eq), and *N,N*-diisopropylethylamine (3.0 eq) in DMF (0.4M) at rt was stirred for 5 min. To the reaction mixture was added (4-methoxyphenyl)methanamine (1.1 eq). After LCMS confirmed desired product, the reaction mixture was diluted with 1N NaOH (aq). After 1h of vigorous stirring, the precipitate was filtered and dried in the 50 °C oven overnight. The product was collected (94% yield). LCMS: Rt=0.913 min, M+H=342.8; >98% @ 215 and 254 nm; <sup>1</sup>H NMR (400 MHz, DMSO-*d*<sub>6</sub>): δ 8.63 (t, *J* = 5.6 Hz, 1H), 7.26 (d, *J* = 8.4 Hz, 2H), 6.90 (d, *J* = 8.3 Hz, 2H), 4.37 (d, *J* = 5.9 Hz, 2H), 3.73 (s, 3H), 2.73 (s, 3H), 2.72 (s, 3H); <sup>13</sup>C NMR (100 MHz, DMSO-*d*<sub>6</sub>): δ 165.0, 160.2, 158.7, 154.8, 146.6, 133.7, 132.0, 129.2, 128.0, 114.2, 103.7, 55.5, 42.4, 20.0, 15.1; HRMS (ESI): calc'd for C<sub>17</sub>H<sub>18</sub>N<sub>4</sub>O<sub>2</sub>S [M]; 342.1150. Found: 342.1152.

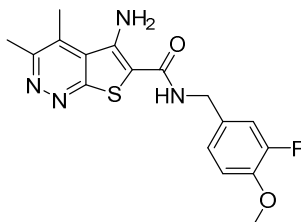

**5-amino-*N*-(3-fluoro-4-methoxybenzyl)-3,4-dimethylthieno[2,3-*c*]pyridazine-6-carboxamide (6c, VU0467485):** A solution of 5-amino-3,4-dimethylthieno[2,3-*c*]pyridazine-6-carboxylate **5** (1.0 eq), HATU (1.2 eq), and *N,N*-diisopropylethylamine (3.0 eq) in DCM:DMF (7:1; 0.2M) at rt was stirred for 5 min. To the reaction mixture was added (4-methoxyphenyl)methanamine (1.1 eq). After LCMS confirms desired product, the reaction mixture was diluted with 2N NaOH (aq) and extracted with 1:1 [3:1 (CHCl<sub>3</sub>/IPA)/ DCM] (3x). The combined organic extractions were washed with water (3x), dried (MgSO<sub>4</sub>), and concentrated *in vacuo*. The solid residue was sonicated in IPA for 5 min and filtered. The solid was washed with cold IPA and dried. The product was collected as a brown solid (66% yield). LCMS: Rt=0.935 min, M+H=360.8; >98% @ 215 and 254 nm; <sup>1</sup>H NMR (400 MHz, DMSO-*d*<sub>6</sub>): δ 8.64 (t, *J* = 5.8 Hz, 1H), 7.27-7.01 (m, 5H), 4.36 (d, *J* = 5.8 Hz, 2H), 3.81 (s, 3H), 2.73 (s, 3H), 2.71 (s, 3H); <sup>13</sup>C NMR (100 MHz, DMSO-*d*<sub>6</sub>): δ 164.9, 160.2, 154.3, 151.7 (d, *J*(C,F) = 242.0 Hz), 146.6, 146.4 (d, *J*(C,F) = 10.6 Hz), 135.5, 132.9 (d, *J*(C,F) = 5.6 Hz), 129.0, 124.0 (d, *J*(C,F) = 3.3 Hz), 115.5 (d, *J*(C,F) = 18.1 Hz), 114.2 (d, *J*(C,F) = 1.8 Hz), 104.5, 56.5, 42.1, 19.3, 15.2; HRMS (ESI): calc'd for C<sub>17</sub>H<sub>17</sub>FN<sub>4</sub>O<sub>2</sub>S [M]; 360.1056. Found: 360.1057.

## **In Vitro Pharmacology Methods**

**Calcium Mobilization Assays.** Compound-evoked increases in intracellular calcium were measured using Chinese hamster ovary (CHO) cells stably expressing rat, human, or cynomolgus monkey muscarinic receptors (M<sub>1</sub>–M<sub>5</sub>; M<sub>2</sub> and M<sub>4</sub> cells were cotransfected with G<sub>qis</sub>). Cells were plated in 384-well, black-walled, clear-bottomed plates in 20  $\mu$ L of assay medium (Dulbecco's modified Eagle's medium (DMEM) supplemented with 10% dialyzed fetal bovine serum, 20 mM *N*-(2-hydroxyethyl)piperazine-*N'*-(2-ethanesulfonic acid (HEPES), and 1 mM sodium pyruvate) at a density of 15000 cells/well and grown overnight at 37 °C/5% CO<sub>2</sub>. The next day, medium was removed, and the cells were incubated with 20  $\mu$ L/well of 1  $\mu$ M Fluo-4AM (Invitrogen, Carlsbad, CA) prepared as a 2.3 mM stock in dimethyl sulfoxide (DMSO), mixed in a 1:1 ratio with 10% (w/v) pluronic acid F-127, and diluted in calcium assay buffer (Hank's balanced salt solution [HBSS], Invitrogen, Carlsbad, CA) supplemented with 20 mM HEPES and 2.5 mM probenecid, pH 7.4, for 50 min at 37 °C. Dye was removed and replaced with 20  $\mu$ L/well of assay buffer. For PAM potency curves, M<sub>4</sub> compounds were diluted in calcium assay buffer and added to the cells followed by the addition of an EC<sub>20</sub> concentration of ACh 140 s later and then an EC<sub>80</sub> concentration of ACh 120 s later. For fold shift experiments, multiple fixed concentrations (50 nM to 30  $\mu$ M) of M<sub>4</sub> compound or vehicle was added followed by the addition of a concentration–response curve of ACh 140 s later. Calcium flux was measured over time as an increase in fluorescence using a functional drug screening system 6000 (FDSS 6000, Hamamatsu, Japan). The change in relative fluorescence over basal was calculated before 936 dx. normalization to the maximal response to ACh. As described previously, shifts of ACh concentration–response curves by the M<sub>4</sub> modulators were globally fitted to an operational model of allosterism.<sup>21</sup> Data (means  $\pm$  SEM, *n* = 3) were analyzed using GraphPad Prism V.5.04 (GraphPad Software, San Diego, CA). Previously described in detail in: *ACS Chem. Neurosci.* **2014**, *5*, 920-941.

## **In Vivo Pharmacology Methods**

**Locomotor Activity Studies in Rats.** Open field activity was tested using a SmartFrame Open Field System (Kinder Scientific, San Diego, CA) with a 16  $\times$  16 array of infrared photobeams located 2.5 cm above the floor of the chamber as previously described.<sup>9,18</sup> To establish the dose–response relationship for amphetamine on locomotor activity, rats were habituated for 60 min in the open field and then injected with vehicle (sterile water SC) or dose of amphetamine (0.75 mg/kg, SC), and locomotor activity was recorded for an additional 60 min. To determine the effects of VU0467485 (**6c**) on reversing amphetamine-induced hyperlocomotion, rats were habituated in the open field for 30 min, followed by administration of vehicle (10% (v/v) Tween 80 in sterile water) or a dose of VU0467485 (**6c**) (1–10 mg/kg PO). After an additional 30 min, vehicle (sterile water) or amphetamine (0.75 mg/kg SC) was injected, and locomotor activity was recorded for another 60 min. The time course of drug-induced changes in ambulation is expressed as mean number of beam breaks per 5 min bin over the 120 min session. Total locomotor activity was calculated as the total number of beam breaks from the time of amphetamine administration [t = 60 min] to the end of the experiment [t = 120 min]. Total activity and

time course data (means  $\pm$  SEM) were analyzed by one-way and two-way ANOVA, respectively, and post hoc comparisons were made by Dunnett's test using GraphPad Prism (La Jolla, CA).

### **In Vitro DMPK Methods**

**PPB, BHB, Hepatic Microsomal  $CL_{int}$  and CYP<sub>450</sub> Inhibition Assays.** Plasma protein binding (PPB), brain homogenate binding (BHB), hepatic microsomal intrinsic clearance ( $CL_{int}$ ), and CYP<sub>450</sub> inhibition assays were performed as described previously [J. Med. Chem. 56: 5208-5212; Drug. Metab. Dispos. 41: 1703-1714; ACS Chem. Neurosci. 7: 1192-1200].

**CYP<sub>450</sub> Induction Assay.** Evaluation of the CYP induction potential of compound **6c** (VU0467485) was performed using an activity-based assay design with CYP-specific probe substrates and a 5-day induction protocol in human hepatocytes. A starter kit for the assessment of CYP induction in cryoplateable human hepatocytes was purchased from Celsis In Vitro Technologies (IVT), now Bioreclamation IVT (Baltimore, MD), that included plating and induction media, assay buffer, and cryostored hepatocytes from a single female donor. All other reagents and materials were commercially available. On day 1, cells were rapidly thawed and viability determined by trypan blue exclusion. Cells were plated in 96-well format at a concentration of  $5 \times 10^4$  cells/well, incubated for 4 hr (37 °C, 5 % CO<sub>2</sub>), with subsequent media change and overnight incubation. On days 3 and 4, CYP-specific inducers (positive controls) were added to the cells over a pre-determined concentration range ( $n = 3$ ) as follows: omeprazole, (CYP 1A2), rifampicin, (CYP 3A4), and an internal compound, (CYP 2B6). Test compound was added in similar fashion over a range of concentrations (0.3 – 100  $\mu$ M). On day 5, changes in CYP activity indicative of induction were assessed by incubating CYP-specific probe substrates (phenacetin, CYP 1A2; midazolam, CYP 3A4; bupropion, CYP 2B6) for 1 hr, followed by termination with ice-cold acetonitrile. The plates were then centrifuged at 3000 rcf for 15 min and the resultant supernatant was removed and diluted 1 x 4 in water for LC-MS/MS analysis on an AB Sciex API-4000 triple-quadrupole instrument. Mass spectral analyses were performed using multiple reaction monitoring (MRM), with transitions specific for each CYP-specific metabolite (acetaminophen, CYP 1A2; 1-hydroxymidazolam, CYP 3A4; hydroxybupropion, CYP 2B6). Control- and compound-dependent changes in metabolite formation were quantitated against a 12-point standard curve and induction potential was reported both as an  $E_{max}$  (fold-induction) and  $EC_{50}$  value ( $\mu$ M).

**Metabolite ID.** Metabolite identification experiments were conducted using hepatic S9 fractions from multiple species (rat [Sprague Dawley], dog [beagle], nonhuman primate [cynomolgus]; male, pooled; BD Biosciences, San Jose, CA) and human hepatic microsomes (mixed gender, pooled, BD Biosciences, San Jose, CA) according to the following procedure. Test compound (**6c**) was incubated (25  $\mu$ M) in a solution of potassium phosphate-buffer (0.1 M, pH 7.4) containing hepatic S9 (5 mg/mL) or hepatic microsomes (1 mg/mL) and relevant cofactors (NADPH, 2 mM in all incubations; UDGPA and PAPs, 2 mM in S9 incubations) at 37 °C in a borosilicate glass vessels under ambient atmosphere for approximately 1 hour. Protein was then precipitated by addition of cold acetonitrile (2X volumes) and centrifugation (3000 rcf) for 10 minutes. Resulting supernatants were dried under a stream of nitrogen gas before reconstitution in an 85:15 (v/v) mixture of aqueous ammonium formate (10 mM, pH 4.1) and

acetonitrile. Samples were then analyzed via LC-UV/MS<sup>n</sup> essentially as described previously [Drug. Metab. Dispos. 41: 1703-1714].

**Reactive Metabolism/Bioactivation Assay.** Potential for metabolic bioactivation of compound **6c** was investigated using human hepatic microsomes via a procedure identical to that used for metabolite identification experiments, except the incubations were additionally fortified with glutathione (3 mM), and LC-UV/MS<sup>n</sup> analysis was performed to identify potential conjugates.

**CYP<sub>450</sub> Reaction Phenotyping and Mapping.** In order to determine the extent of involvement of various CYPs to the metabolism of **6c** and to estimate the relative contributions of these CYPs to the formation of its specific metabolites, *in vitro* incubations were carried out using commercially available human EasyCYP bacosomes (Cypex, available through Xenotech, Lenexa, KS). EasyCYP bacosomes express human CYPs and reductase (with or without cytochrome *b<sub>5</sub>*) at standardized CYP concentrations and total protein concentrations. Briefly, the test compound was pre-incubated for 5 min (final concentration 10-25  $\mu$ M) in 100 mM potassium phosphate buffer (pH 7.4) containing 125 pmol of CYP enzyme at 37 °C, prior to initiation of the reaction with NADPH (1 mM). Control bacosomes that do not express any CYP enzymes are also simultaneously incubated with the test compound and either buffer or NADPH was then added after the 5 min pre-incubation time. The reactions were allowed to proceed for 1 hr, followed by termination with ice-cold acetonitrile (2X volumes) and centrifugation at 3000 *ref*, 4 °C, for 10 min. The resulting supernatant was removed and transferred to a separate tube and dried under nitrogen gas prior to reconstitution for LC-UV/MS<sup>n</sup> analysis essentially as described previously [Drug. Metab. Dispos. 41: 1703-1714]. Resulting data were then used to map individual CYPs to the formation of each metabolite and, in conjunction with the *in vitro* CL<sub>int</sub> data (from human hepatic microsomes), the fractional (%) contribution of each CYP to the total CYP-mediated metabolism of **6c** was determined via an intersystem extrapolation factor (ISEF)-based approach [Drug Metab. Dispos. 39: 373-382].

**Caco-2 and MDCK-MDR1 Permeability/Efflux Assays.** Monodirectional (A→B) permeability of compound **6c** was determined in Caco-2 cells, and bidirectional permeability was determined in MDCK-MDR1 (human P-gp) cells via Absorption Systems (Exton, PA) using their standard transwell assay procedures and a 5  $\mu$ M concentration of test compound.

### **In Vivo DMPK Methods**

**Animal Care and Use.** All animal procedures were approved by the respective Institutional Animal Care and Use Committees and conducted in accordance with the National Institutes of Health *Principles of Laboratory Animal Care* and/or the National Research Council's *Guide for the Care and Use of Laboratory Animals*.

**Rat Brain Distribution.** Distribution of compound **6c** from systemic plasma to brain tissue was determined 1.5 hours following a single oral administration (1, 3, or 10 mg/kg; vehicle: 10% [v/v] tween80 in water, 10 mL/kg dose volume) of the mono-HCl salt to male, Sprague Dawley rats (*n* = 7-8 per dose level; fasted). Sample preparation and LC-MS/MS bioanalysis was performed as described previously [J. Med. Chem. 56: 5208-5212; Drug. Metab. Dispos. 41: 1703-1714; ACS Chem. Neurosci. 7: 1192-1200]. The observed total brain:plasma distribution partition coefficients (*K<sub>p</sub>*) were similar

across each of the dose groups, and thus  $K_p$  values from all animals/groups were averaged (arithmetic mean). The mean unbound brain:unbound plasma distribution partition coefficient ( $K_{p,uu}$ ) was calculated by division of the mean  $K_p$  by [rat  $f_{u,plasma}$  / rat  $f_{u,brain}$ ] derived from the in vitro PPB and BHB assays.

**Dog Brain Distribution.** Distribution of compound **6c** from systemic plasma to brain tissue was determined 2.0 hours following a single oral administration (3 mg/kg; vehicle: 30% [w/v] hydroxypropyl- $\beta$ -cyclodextrin in water, 5 mL/kg dose volume; fasted) of the mono-HCl salt to a female, Mongrel dog ( $n = 1$ ), which was previously/independently scheduled for euthanasia. Sample preparation and LC-MS/MS bioanalysis was performed essentially as described previously [J. Med. Chem. 56: 5208-5212; Drug. Metab. Dispos. 41: 1703-1714; ACS Chem. Neurosci. 7: 1192-1200], except the brain sample was subjected to manual sectioning and homogenization by a sonication probe.  $K_{p,uu}$  was calculated by division of the  $K_p$  by [dog  $f_{u,plasma}$  / dog  $f_{u,brain}$ ] derived from in vitro PPB and BHB data.

**Rat Pharmacokinetics.** The plasma pharmacokinetics of compound **6c** was determined in male, Sprague Dawley rat following a single IV administration (1 mg/kg; vehicle: 10% EtOH 60% PEG400 30% saline [v/v/v], 1 mL/kg dose volume;  $n = 1$ ) of the freebase, and separately, following a single PO administration (3 mg/kg; vehicle: 0.1% [v/v] Tween80 0.5% methylcellulose in water, 10 mL/kg dose volume;  $n = 2$ ; fasted) of the mono-HCl salt using procedures for sample collection, sample preparation, and LC-MS/MS bioanalysis described previously [J. Med. Chem. 56: 5208-5212; Drug. Metab. Dispos. 41: 1703-1714; ACS Chem. Neurosci. 7: 1192-1200]. Raw time-concentration data from individual animals were subjected to noncompartmental analysis (NCA) via Phoenix<sup>®</sup> WinNonlin<sup>®</sup> (v.5.3; Certara USA Inc., Princeton, NJ), and in the case of the oral study, resulting PK parameters from each animal were averaged.

**Dog Pharmacokinetics.** The plasma pharmacokinetics of compound **6c** was determined in male, Beagle dog ( $n = 2$ ) following a single IV administration (1 mg/kg; vehicle: 10% EtOH 60% PEG400 30% saline [v/v/v], 1 mL/kg dose volume), and separately, following a single PO administration (3 mg/kg; vehicle: 0.1% [v/v] Tween80 0.5% [v/v] in water, 5 mL/kg dose volume; fasted) of the mono-HCl salt via a crossover design (i.e., animals were dosed IV and then PO following a washout period). The in-life phases, sample preparation, LC-MS/MS bioanalysis, and subsequent NCA PK analysis of individual animal raw time-concentration data were performed via Frontage Laboratories (Exton, PA) in accordance with their established Standard Operating Procedures (SOPs) and IACUC protocols.

**Nonhuman Primate Pharmacokinetics.** The plasma pharmacokinetics of compound **6c** was determined in male, cynomolgus monkey ( $n = 1$ ) following a single IV administration (0.2 mg/kg, vehicle: 10% EtOH 50% PEG400 40% saline [v/v/v], 1 mL/kg dose volume) of the free base. The in-life phase, sample preparation, LC-MS/MS bioanalysis, and subsequent NCA PK analysis of individual animal raw time-concentration data were performed via Frontage Laboratories (Exton, PA) in accordance with their established Standard Operating Procedures (SOPs) and IACUC protocols.

### **Ancillary Pharmacology, Physiochemical Properties, and Mutagenicity**

**Mini-Ames Test.** The mutagenic potential of **6c** was investigated by a mini-Ames test (TA98/TA100; +/- human hepatic S9) performed internally by AstraZeneca (AZ) using standard assay procedures.

**Ancillary Pharmacology and Physiochemical Properties.** The ancillary pharmacology and physiochemical properties of VU0467485/AZ13713945 (**6c**) were evaluated internally at AZ and via Pharmaron (Beijing, China) and Cerep (Celle L'Evescault, France) using standard assay procedures, and the results of these experiments are presented below.

| <u>Test Name</u>             | <u>Result Type</u>      | <u>Result</u> |
|------------------------------|-------------------------|---------------|
| hERG Hu CHO IF Ephs CR       | Mean IC50 (μM)          | >33.3         |
| hERG Hu CHO IF Ephs SP       | Mean % Inhib (at 10 μM) | 4.512         |
| Na1.5 Hu CHO IF Ephs CR      | Mean IC50 (μM)          | >33.3         |
| IKs Hu CHO IF Ephs CR        | Mean IC50 (μM)          | >33.3         |
| Ito Kv4.3 Hu CHO IF Ephs CR  | Mean IC50 (μM)          | >33.3         |
| D2 Hu Bind FW CR             | Mean IC50 (μM)          | >100          |
| a1B Hu Bind FW CR            | Mean IC50 (μM)          | >100          |
| a2C Hu Bind FW CR            | Mean IC50 (μM)          | >100          |
| EtA Hu Bind FW CR            | Mean IC50 (μM)          | >100          |
| GABAA1b2g2 Hu Bind FW CR     | Mean IC50 (μM)          | >100          |
| H1 Hu Bind FW CR             | Mean IC50 (μM)          | >100          |
| H2 Hu Bind FW CR             | Mean IC50 (μM)          | >30           |
| GR HU Cyto Bind FW CR        | Mean IC50 (μM)          | >100          |
| DOP2 Hu Bind FW CR           | Mean IC50 (μM)          | >100          |
| b1 Hu HEK cAMP TRF CR        | Mean IC50 (μM)          | >100          |
| D1 Hu CHO cAMP TRF CR        | Mean IC50 (μM)          | >100          |
| Ang2 AT1 Hu HEK [Ca2+] Ag CR | Mean EC50 (μM)          | >100          |
| Ang2 AT1 Hu [Ca2+] Antag CR  | Mean IC50 (μM)          | >30           |
| DAT hu Bind FW CR            | Mean IC50 (μM)          | >100          |
| D3 Hu Bind FW CR             | Mean IC50 (μM)          | >100          |
| A1 Hu CHO Imped CDS Ag CR    | Mean EC50 (μM)          | >30           |
| A1 Hu CHO Imped CDS Antag CR | Mean IC50 (μM)          | >30           |
| a1A Hu CHO [Ca2+] Ag CR      | Mean EC50 (μM)          | >30           |
| a1A Hu CHO [Ca2+] Antag CR   | Mean IC50 (μM)          | >30           |
| a2A Hu CHO Imped CDS Ag CR   | Mean EC50 (μM)          | >30           |
| b1 Hu HEK cAMP TRF Ag CR     | Mean EC50 (μM)          | >100          |
| 5HT2B Hu Bind FW CR          | Mean IC50 (μM)          | >100          |
| A1 Hu Bind FW CR             | Mean IC50 (μM)          | >100          |
| a1A Hu Bind FW CR            | Mean IC50 (μM)          | >100          |
| CB1 Hu Bind FW CR            | Mean IC50 (μM)          | >100          |
| ACHE HU Enz Photometry CR    | Mean IC50 (μM)          | >100          |
| A2A Hu Bind FW CR            | Mean IC50 (μM)          | >100          |
| PDE3? Hu Enz TRF CR          | Mean IC50 (μM)          | >100          |
| PDE4D Hu Enz TRF CR          | Mean IC50 (μM)          | >100          |
| 5-HT1A Hu Bind FW CR         | Mean IC50 (μM)          | >100          |
| 5-HT1D Rat Bind FW CR        | Mean IC50 (μM)          | >100          |



|                                 |                |      |
|---------------------------------|----------------|------|
| GABA? Rat Bind FW CR            | Mean IC50 (μM) | >100 |
| 5-HT2C Hu Bind FW CR            | Mean IC50 (μM) | >100 |
| 5HT3 Hu Bind FW CR              | Mean IC50 (μM) | >100 |
| 5HT4 Hu Bind FW CR              | Mean IC50 (μM) | >100 |
| D3 Hu CHO cAMP TRF Ag CR        | Mean EC50 (μM) | >100 |
| D3 Hu CHO cAMP TRF Antag CR     | Mean IC50 (μM) | >100 |
| MR2 Hu CHO cAMP RF Antag CR     | Mean IC50 (μM) | >100 |
| SST4 Hu CHO cAMP TRF Ag CR      | Mean EC50 (μM) | >100 |
| SST4 Hu CHO cAMP TRF Antag CR   | Mean IC50 (μM) | >100 |
| D2 Hu HEK Imped CDS Ag CR       | Mean EC50 (μM) | >30  |
| SST4 Hu Bind FW CR              | Mean IC50 (μM) | >100 |
| D2 Hu HEK Imped CDS Antag CR    | Mean IC50 (μM) | >30  |
| H2 Hu CHO cAMP TRF Antag CR     | Mean IC50 (μM) | >100 |
| OPRk1 Rat CHO cAMP TRF Ag CR    | Mean EC50 (μM) | >100 |
| OPRk1 Rat CHO cAMP TRF Antag CR | Mean IC50 (μM) | >100 |
| M1 Hu CHO [Ca2+] Ag CR          | Mean EC50 (μM) | 34.8 |
| M1 Hu CHO [Ca2+] Antag CR       | Mean IC50 (μM) | >30  |
| H1 Hu HEK [Ca2+] Ag CR          | Mean EC50 (μM) | >100 |
| H1 Hu HEK [Ca2+] Antag CR       | Mean IC50 (μM) | >30  |
| H2 Hu CHO cAMP TRF Ag CR        | Mean EC50 (μM) | >100 |
| 5HT1B Ham CHO Imped Antag CR    | Mean IC50 (μM) | >30  |
| CB1 Hu CHO cAMP TRF Ag CR       | Mean EC50 (μM) | >100 |
| a2A Hu Bind FW CR               | Mean IC50 (μM) | >100 |
| CB1 Hu CHO cAMP TRF Antag CR    | Mean IC50 (μM) | >100 |
| b1 Hu Bind FW CR                | Mean IC50 (μM) | >100 |
| D1 Hu Bind FW CR                | Mean IC50 (μM) | >100 |
| 5HT2B Hu CHO IP1 TRF Antag CR   | Mean IC50 (μM) | >100 |
| D1 Hu CHO cAMP TRF Ag CR        | Mean EC50 (μM) | >100 |
| M2 Hu CHO cAMP TRF Ag CR        | Mean EC50 (μM) | >100 |
| EtA Hu SKN [Ca2+] Antag CR      | Mean IC50 (μM) | >30  |
| M2 Hu Bind FW CR                | Mean IC50 (μM) | >100 |
| OPRm1 Hu Bind FW CR             | Mean IC50 (μM) | >100 |
| NAchA1 Hu Bind FW CR            | Mean IC50 (μM) | >100 |
| NAchA4 Hu Bind FW CR            | Mean IC50 (μM) | >100 |
| NET Hu Bind FW CR               | Mean IC50 (μM) | >100 |
| 5HT1B Ham CHO Imped Ag CR       | Mean EC50 (μM) | >30  |
| EtA Hu [Ca2+] Ag CR             | Mean EC50 (μM) | 99.8 |
| a2C Hu CHO cAMP TRF Ag CR       | Mean EC50 (μM) | >100 |
| a2C Hu CHO cAMP TRF Antag CR    | Mean IC50 (μM) | >100 |
| OPRk1 Rat Bind FW CR            | Mean IC50 (μM) | >100 |
| a1B Hu CHO cAMP TRF Ag CR       | Mean EC50 (μM) | >100 |
| M1 Hu Bind FW CR                | Mean IC50 (μM) | >100 |
| M5 Hu Bind FW CR                | Mean IC50 (μM) | >100 |

|                                |                |      |
|--------------------------------|----------------|------|
| MR2 Hu Bind FW CR              | Mean IC50 (μM) | >100 |
| NK1 Hu Bind FW CR              | Mean IC50 (μM) | 20.3 |
| a1B Hu CHO cAMP TRF Antag CR   | Mean IC50 (μM) | >100 |
| M2 Hu CHO cAMP TRF Antag CR    | Mean IC50 (μM) | >100 |
| OPRM1 Hu CHO cAMP TRF Ag CR    | Mean EC50 (μM) | 27.5 |
| OPRM1 Hu CHO cAMP TRF Antag CR | Mean IC50 (μM) | >100 |
| 5HT2B Hu CHO IP1 TRF Ag CR     | Mean EC50 (μM) | >100 |
| 5-HT1D Rat CHO Imped Antag CR  | Mean IC50 (μM) | >30  |
| 5HT4 Hu CHO cAMP TRF Ag CR     | Mean EC50 (μM) | >100 |
| GABAA Rat Bind FW CR           | Mean IC50 (μM) | 1.20 |
| ARG1 Hu Enz Photometry CR      | Mean IC50 (μM) | >100 |
| 5HT4 Hu CHO cAMP TRF Antag CR  | Mean IC50 (μM) | >100 |
| 5-HT7 Hu CHO cAMP TRF Ag CR    | Mean EC50 (μM) | >100 |
| 5-HT7 Hu CHO cAMP TRF Antag CR | Mean IC50 (μM) | >100 |
| BK2 Hu CHO [Ca2+] Ag CR        | Mean EC50 (μM) | >100 |
| BK2 Hu CHO [Ca2+] Antag CR     | Mean IC50 (μM) | >30  |
| b2 Hu CHO cAMP TRF Ag CR       | Mean EC50 (μM) | >100 |
| b2 Hu CHO cAMP TRF Antag CR    | Mean IC50 (μM) | >100 |
| NAchA7 Hu Bind FW CR           | Mean IC50 (μM) | >100 |
| NMDA Rat Bind FW CR            | Mean IC50 (μM) | >100 |
| Sigma1 Hu Bind FW CR           | Mean IC50 (μM) | 18.0 |
| 5-HT1A Hu HEK Imped CDS Ag CR  | Mean EC50 (μM) | >30  |
| 5-HT1D Rat CHO Imped Ag CR     | Mean EC50 (μM) | >30  |
| CatS Hu Enz Fluorimetry CR     | Mean IC50 (μM) | >30  |
| PPARgamma Hu Bind FW CR        | Mean IC50 (μM) | >100 |
| 5-HT2C Hu HEK IP1 TRF Ag CR    | Mean EC50 (μM) | >100 |
| 5-HT1A Hu HEK Imped Antag CR   | Mean IC50 (μM) | >30  |
| ROCK2 Hu Enz TRF CR            | Mean IC50 (μM) | >100 |
| 5HT7 Hu Bind FW CR             | Mean IC50 (μM) | >100 |
| TSPO Rat Bind CR               | Mean IC50 (μM) | >100 |
| GABAB Hu Bind FW CR            | Mean IC50 (μM) | >100 |
| Ghre Hu Binding CR             | Mean IC50 (μM) | 11.8 |
| COX1 Hu Enz TRF CR             | Mean IC50 (μM) | >100 |
| cKIT Hu Enz TRF CR             | Mean IC50 (μM) | >100 |
| GSK3b Hu Enz TRF CR            | Mean IC50 (μM) | >100 |
| PDE6 Bov Enz CR                | Mean IC50 (μM) | >100 |
| PDK1 Hu Enz TRF CR             | Mean IC50 (μM) | >100 |
| ROCK1 Hu Enz TRF CR            | Mean IC50 (μM) | >100 |
| MAO-B Hu Enz Lumin CR          | Mean IC50 (μM) | >100 |
| MMP2 Hu Enz Fluorimetry CR     | Mean IC50 (μM) | >100 |
| PDE10A1 Hu Enz TRF CR          | Mean IC50 (μM) | >100 |
| ALK4 Hu Enz TRF CR             | Mean IC50 (μM) | >100 |
| FGFR1 Hu Enz FRET CR           | Mean IC50 (μM) | >100 |

|                                 |                |      |
|---------------------------------|----------------|------|
| a2A Hu CHO Imped Antag CR       | Mean IC50 (μM) | >30  |
| A2A Rat PC12 cAMP TRF Ag CR     | Mean EC50 (μM) | >100 |
| A2A Rat PC12 cAMP TRF Antag CR  | Mean IC50 (μM) | >100 |
| DOP2 Rat PC12 CDS Ag CR         | Mean EC50 (μM) | >30  |
| DOP2 Rat PC12 CDS Antag CR      | Mean IC50 (μM) | >30  |
| MR2 Hu CHO cAMP TRF Ag CR       | Mean EC50 (μM) | >100 |
| Na+/K+? ATPase Pig Photomet CR  | Mean IC50 (μM) | >100 |
| EGFR kinase Hu Enz TRF CR       | Mean IC50 (μM) | >100 |
| src Hu Enz TRF CR               | Mean IC50 (μM) | >100 |
| MAP3K7 Hu Enz TRF CR            | Mean IC50 (μM) | >100 |
| TRKA Hu Enz TRF CR              | Mean IC50 (μM) | >100 |
| eNOS Hu HUVEC Enz CR            | Mean IC50 (μM) | >100 |
| NK1 Hu U-373 MG [Ca2+] Ag CR    | Mean EC50 (μM) | 84.5 |
| TXA2 sy Hu Platelet Enz EIA CR  | Mean IC50 (μM) | 84.5 |
| 5-HT2C Hu HEK IP1 TRF Antag CR  | Mean IC50 (μM) | >100 |
| AT Gpig Bind FW CR              | Mean IC50 (μM) | 1.51 |
| BK2 Hu Bind FW CR               | Mean IC50 (μM) | >100 |
| ECE1 Hu Enz Fluorimetry CR      | Mean IC50 (μM) | >100 |
| b2 Hu Bind FW CR                | Mean IC50 (μM) | >100 |
| KDR Hu Enz TRF CR               | Mean IC50 (μM) | >100 |
| SET Hu Bind FW CR               | Mean IC50 (μM) | >100 |
| INSR Hu Enz TRF CR              | Mean IC50 (μM) | >100 |
| COX2 Hu Enz TRF CR              | Mean IC50 (μM) | >30  |
| RARa Hu Binding SPA CR          | Mean IC50 (μM) | >100 |
| Ghre Hu CHO [Ca2+] Ag CR        | Mean EC50 (μM) | >30  |
| AurKA Hu Enz TRF CR             | Mean Ki (μM)   | >100 |
| GABAB hu CHO Imped CDS Ag CR    | Mean EC50 (μM) | >30  |
| GABAB hu CHO Imped CDS Antag CR | Mean IC50 (μM) | >30  |
| CaV-L Rat extract Bind CR       | Mean IC50 (μM) | 66.8 |
|                                 | Mean Ki (μM)   | 33.4 |
| CaV-L Rat extract Bind CR       | Mean IC50 (μM) | 30.1 |
|                                 | Mean Ki (μM)   | 23.4 |
| THP1 Fluo tox                   | Mean IC50 (μM) | >250 |

**Structures, Activities, and *In Vitro* Intrinsic Clearance of 2, 3, and Analogues 6.**

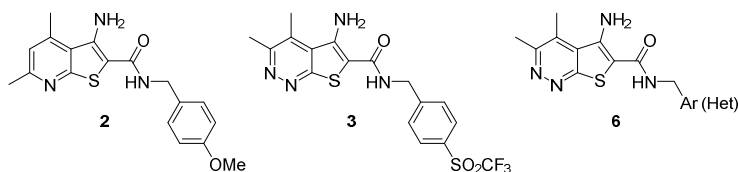

| Entry     | Ar (Het) for Analogues 6 | hM <sub>4</sub> EC <sub>50</sub> (nM) <sup>a</sup><br>[% ACh Max ±SEM] | hM <sub>4</sub> pEC <sub>50</sub><br>(±SEM) | rM <sub>4</sub> EC <sub>50</sub> (nM) <sup>a</sup><br>[% ACh Max ±SEM] | rM <sub>4</sub> pEC <sub>50</sub><br>(±SEM) | human CL <sub>int</sub> <sup>b</sup><br>(mL/min/kg) | rat CL <sub>int</sub> <sup>b</sup><br>(mL/min/kg) |
|-----------|--------------------------|------------------------------------------------------------------------|---------------------------------------------|------------------------------------------------------------------------|---------------------------------------------|-----------------------------------------------------|---------------------------------------------------|
| <b>2</b>  | -                        | 631<br>[81.4±0.9]                                                      | 6.20±0.01                                   | 257<br>[69.0±5.0]                                                      | 6.59±0.07                                   | 60.8                                                | 206                                               |
| <b>3</b>  | -                        | 627<br>[54.9±3.3]                                                      | 6.20±0.06                                   | 17.7<br>[68.1±1.6]                                                     | 7.75±0.06                                   | 19.8                                                | 47.7                                              |
| <b>6a</b> |                          | 130<br>[83.7±3.5]                                                      | 6.89±0.06                                   | 59.7<br>[78.1±1.7]                                                     | 7.22±0.06                                   | 35.9                                                | 80.5                                              |
| <b>6b</b> |                          | 96.7<br>[69.8±2.2]                                                     | 7.01±0.08                                   | 70.8<br>[70.3±10.9]                                                    | 7.15±0.11                                   | 17.7                                                | 24.7                                              |
| <b>6c</b> |                          | 78.8<br>[80.6±0.7]                                                     | 7.10±0.01                                   | 26.6<br>[68.7±3.4]                                                     | 7.57±0.05                                   | 26.1                                                | 73.4                                              |
| <b>6d</b> |                          | 90.6<br>[75.5±2.4]                                                     | 7.04±0.14                                   | 24.5<br>[80.0 (n=2)]                                                   | 7.61 (n=2)                                  | 87.7                                                | 223                                               |
| <b>6e</b> |                          | 41.4<br>[68.5±1.4]                                                     | 7.38±0.05                                   | 28.8<br>[91.4 (n=2)]                                                   | 7.54 (n=2)                                  | 42.8                                                | 162                                               |
| <b>6f</b> |                          | 84.1<br>[75.3±1.1]                                                     | 7.07±0.03                                   | 17.4<br>[91.0 (n=2)]                                                   | 7.76 (n=2)                                  | 86.9                                                | 131                                               |
| <b>6g</b> |                          | 43.4<br>[71.2±3.6]                                                     | 7.36±0.02                                   | 17.8<br>[92.6±2.9]                                                     | 7.75±0.15                                   | 46.9                                                | 217                                               |
| <b>6h</b> |                          | 100<br>[87.1±1.9]                                                      | 6.99±0.06                                   | 29.5<br>[97.0 (n=1)]                                                   | 7.53 (n=1)                                  | 36.3                                                | 134                                               |
| <b>6i</b> |                          | 239<br>[76.9±2.8]                                                      | 6.62±0.11                                   | 107.2<br>[86.1±7.6]                                                    | 6.97±0.08                                   | 16.8                                                | 33.2                                              |

|           |                                                                                   |                            |                   |                      |            |      |      |
|-----------|-----------------------------------------------------------------------------------|----------------------------|-------------------|----------------------|------------|------|------|
| <b>6j</b> | 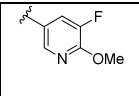 | 142<br>[80.8±1.5]          | 6.85±0.08         | 25.1<br>[77.9 (n=1)] | 7.60 (n=1) | 28.9 | 77.4 |
| <b>6k</b> |  | 59.1<br>[83.1±2.9]         | 7.22±0.07         | 33.1<br>[80.8 (n=2)] | 7.48 (n=2) | 58.2 | 52.7 |
| <b>6l</b> |  | >10                        | >5.0              | n.d                  | n.d        | n.d. | n.d. |
| <b>6m</b> |  | 508<br>[62.4±2.5]          | 6.29±0.09         | n.d                  | n.d        | n.d. | n.d. |
| <b>6n</b> |  | 55.7<br>[87.1±0.8]         | 7.25±0.04         | n.d                  | n.d        | 49.2 | 173  |
| <b>6o</b> |  | 213 <sup>b</sup><br>[60.9] | 6.72 <sup>b</sup> | 29.5<br>[68.4 (n=1)] | 7.53 (n=1) | 61.1 | 92.6 |

<sup>a</sup>Calcium mobilization assays with human or rat M<sub>4</sub>/Gq15-CHO cells performed in the presence of an EC<sub>20</sub> fixed concentration of acetylcholine; values represent means from three (n=3) independent experiments performed in triplicate, unless otherwise indicated.

<sup>b</sup>Loss-of-parent vs. time (i.e., t<sub>1/2</sub> method; 1 μM test compound concentration) in human or rat hepatic microsomes with incorporation of species-specific physiological scaling factors; values represent results from one to three (n=1-3) determinations performed in triplicate.
